# Supplementary material for: An Ensemble Classifier to Predict Protein–Protein Interactions by Combining PSSM-based Evolutionary Information with Local Binary Pattern Model
Source: PubMed Central journal article supplement (PMC6679202; doi:10.3390/ijms20143511), 2019-07-17
Supplement: ijms-20-03511-s001.pdf [file ijms-20-03511-s001.pdf]

**Table S1:** 5-fold cross-validation results obtained by using the proposed method on *Yeast* dataset.

| Testing set | ACC(%)     | PE(%)      | SN(%)      | MCC(%)     | AUC(%)     |
|-------------|------------|------------|------------|------------|------------|
| 1           | 93.03      | 95.22      | 90.87      | 87.02      | 97.12      |
| 2           | 91.86      | 93.70      | 89.66      | 85.03      | 95.55      |
| 3           | 91.60      | 94.81      | 88.30      | 84.58      | 95.20      |
| 4           | 92.04      | 93.37      | 90.33      | 85.34      | 96.56      |
| 5           | 92.05      | 93.90      | 89.63      | 85.34      | 96.13      |
| Average     | 92.12±0.54 | 94.20±0.78 | 89.76±0.96 | 85.46±0.92 | 96.11±0.77 |

**Table S2:** 5-fold cross-validation results obtained by using the proposed method on *Human* dataset.

| Testing set | ACC(%)     | PE(%)      | SN(%)      | MCC(%)     | AUC(%)     |
|-------------|------------|------------|------------|------------|------------|
| 1           | 96.20      | 98.54      | 93.56      | 92.67      | 98.64      |
| 2           | 97.43      | 98.04      | 96.53      | 94.97      | 99.33      |
| 3           | 95.71      | 96.62      | 94.42      | 91.77      | 98.52      |
| 4           | 95.47      | 95.54      | 94.52      | 91.27      | 97.99      |
| 5           | 96.26      | 97.41      | 94.83      | 92.79      | 98.61      |
| Average     | 96.21±0.76 | 97.23±1.19 | 94.77±1.09 | 92.70±1.42 | 98.62±0.48 |

**Table S3:** 5-fold cross-validation results obtained by using the proposed method on *H. pylori* dataset.

| Testing set | ACC(%)     | PE(%)      | SN(%)      | MCC(%)     | AUC(%)     |
|-------------|------------|------------|------------|------------|------------|
| 1           | 86.28      | 89.14      | 82.35      | 76.24      | 93.19      |
| 2           | 85.93      | 90.20      | 83.44      | 75.71      | 92.22      |
| 3           | 87.14      | 86.90      | 87.20      | 77.58      | 93.11      |
| 4           | 86.79      | 85.66      | 87.19      | 77.05      | 92.18      |
| 5           | 86.82      | 86.59      | 85.66      | 77.05      | 92.74      |
| Average     | 86.59±0.48 | 87.70±1.89 | 85.17±2.20 | 76.73±0.74 | 92.69±0.48 |
